# Supplementary material
Source: Springer Nature journal article supplement (https://www.springermedizin.de/resource/supplementary/40345_2013_12_MOESM3_ESM.pdf/25658290)

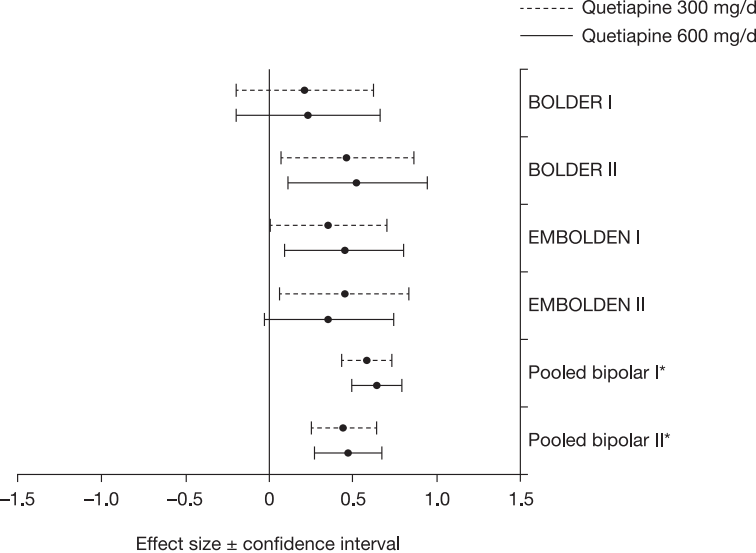

\*Pooled from BOLDER I & II and EMBOLDEN I & II

Supplement: MOESM3 [file 25658290]
